# Supplementary material for: A Potential Role for Endogenous Glucagon in Preventing Post-Bariatric Hypoglycemia
Source: PubMed Central journal article supplement (PMC7793799; doi:10.3389/fendo.2020.608248), 2020-11-30
Supplement: Table_1.pdf [file Table_1.pdf]

## *Supplementary Material*

### 1 Supplementary Table 1

Anthropometric, demographic and metabolic features of post-RYGB patients according to clinical presentation (*Sym* and *Asy*).

|                                           | Clinical presentation |               |                |
|-------------------------------------------|-----------------------|---------------|----------------|
|                                           | <i>Sym</i>            | <i>Asy</i>    | <i>p</i> value |
| N (% of total)                            | 14 (60.9%)            | 9 (39.1%)     | NA             |
| Sex (male/female)                         | 3/11                  | 1/8           | 1.000          |
| Age at surgery (years)                    | 44.5 ± 2.2            | 38.1 ± 3.0    | 0.097          |
| History of T2DM before surgery (yes/no)   | 3/11                  | 0/9           | 0.253          |
| Follow-up time after surgery (years)      | 4.8 ± 0.6             | 3.9 ± 0.7     | 0.318          |
| BMI before surgery (kg/m <sup>2</sup> )   | 40.2 ± 1.6            | 41.8 ± 1.2    | 0.472          |
| BMI after surgery(kg/m <sup>2</sup> )     | 28.0 ± 0.9            | 28.1 ± 0.8    | 0.952          |
| %EBMIL (%)                                | 83.1 ± 5.2            | 81.7 ± 4.8    | 0.860          |
| %TWL (%)                                  | 29.7 ± 1.9            | 32.5 ± 2.1    | 0.352          |
| HbA1c (mmol/mol)                          | 35.1 ± 1.0            | 35.1 ± 1.4    | 1.000          |
| HbA1c (%)                                 | 5.4 ± 0.1             | 5.4 ± 0.1     | 1.000          |
| HOMA2-B (%)                               | 68.5 ± 6.2            | 82.0 ± 4.5    | 0.129          |
| HOMA2-S (%)                               | 160.0 ± 12.0          | 130.4 ± 14.9  | 0.138          |
| HOMA2-IR                                  | 0.6 (0.5-0.8)         | 0.8 (0.6-1.0) | 0.154          |
| Glycaemic nadir MMTT <3.05mmol/l (yes/no) | 7/7                   | 4/5           | 1.000          |
| Dumping criteria (yes/no)                 | 13/1                  | 8/1           | 0.478          |

Results are presented as mean ± SEM, median (interquartile range) or proportions. Abbreviations: MMTT – mixed-meal tolerance test; *Sym* – Subjects reporting symptomatology compatible with post-bariatric hypoglycemia; *Asy* – Asymptomatic surgical controls; T2DM – type 2 diabetes mellitus; BMI – body mass index; EBMIL – excess BMI loss; TWL – total weight loss; HOMA2-B - homeostasis model assessment for β-cell function; HOMA2-S - homeostasis model assessment for insulin sensitivity; HOMA2-IR – homeostasis model assessment for insulin resistance.
